# Supplementary material for: Genomic analysis of Xenopus organizer function
Source: PubMed Central journal article supplement (PMC1513553; doi:10.1186/1471-213x-6-27), 2006-06-06

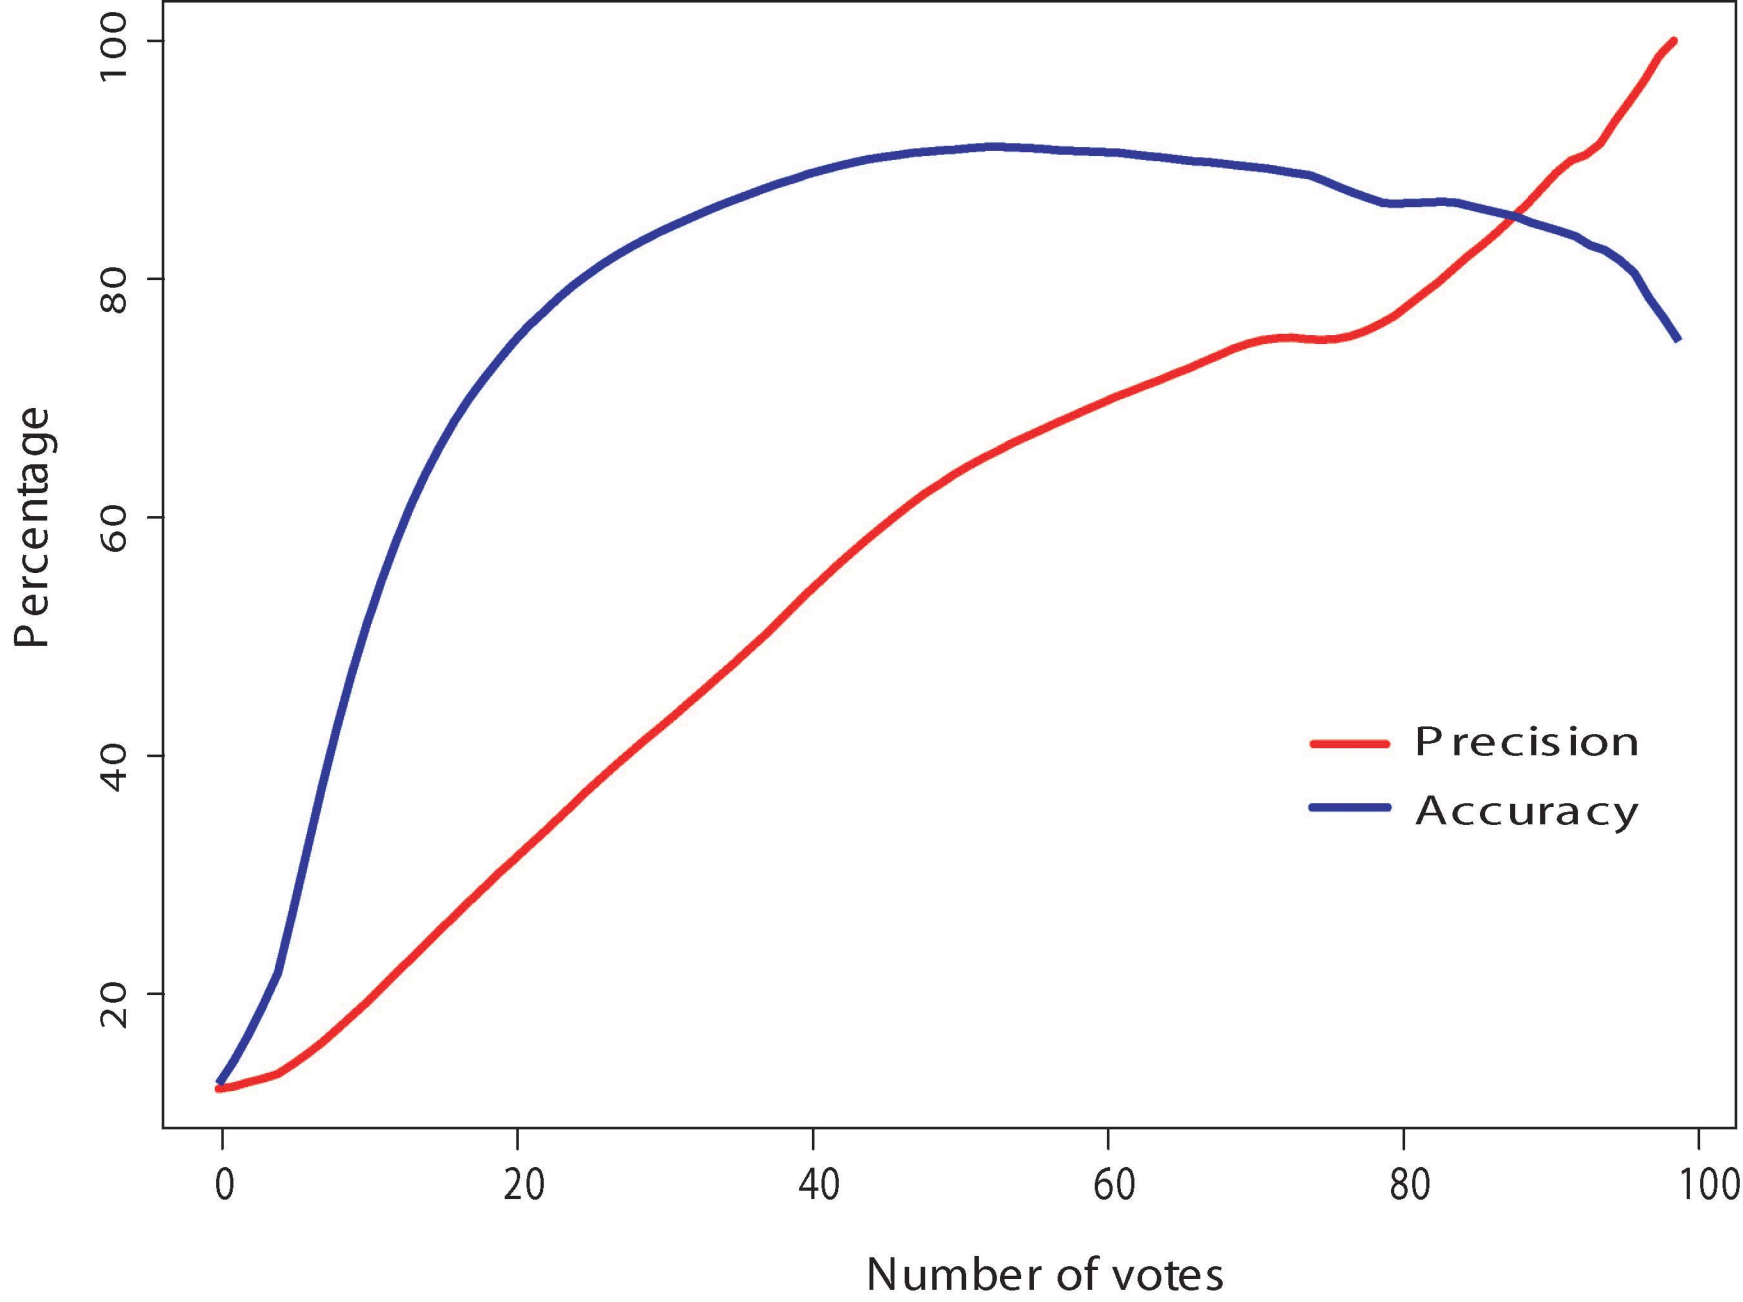

Supplement: 1471-213X-6-27-S5.pdf [file 1471-213X-6-27-S5.pdf]
